# Supplementary material for: Conformation-Associated C···dz2-PtII Tetrel Bonding: The Case of Cyclometallated Platinum(II) Complex with 4-Cyanopyridyl Urea Ligand
Source: MDPI journal article supplement (doi:10.3390/ijms25074052), 2024-04-05
Supplement: s1 [file s1]

## Electronic supplementary materials

# **Conformation-Associated C $\cdots$ d<sub>z</sub><sup>2</sup>-Pt<sup>II</sup> Tetrel Bonding: The Case of Cyclometallated Platinum(II) Complex with 4-Cyanopyridyl Urea Ligand**

Sergey V. Baykov\*, Eugene A. Katlenok, Svetlana O. Baykova, Artem V. Semenov,  
Nadezhda A. Bokach\* and Vadim P. Boyarskiy

*Institute of Chemistry, St. Petersburg State University, 7/9 Universitetskaya Nab.,  
Saint Petersburg 199034, Russia*

## Content

|                                                             |   |
|-------------------------------------------------------------|---|
| 1. X-ray diffraction data.....                              | 3 |
| 2. Copies of NMR and HRMS spectra of complex <b>3</b> ..... | 6 |
| 3. Computational study.....                                 | 8 |
| 4. Cartesian coordinates for the studied molecules .....    | 9 |

## 1. X-ray diffraction data

**Table S1.** Crystal data and structure refinement parameters for crystal **3** and **3·2MeCN**.

|                                              |                                                                    |                                                                   |
|----------------------------------------------|--------------------------------------------------------------------|-------------------------------------------------------------------|
| Cocrystal                                    | <b>3</b>                                                           | <b>3·2MeCN</b>                                                    |
| Identification code                          | BSC-356                                                            | BSC-559                                                           |
| CCDC number                                  | 2323847                                                            | 2323848                                                           |
| Empirical formula                            | C <sub>27</sub> H <sub>27</sub> ClN <sub>6</sub> OPt               | C <sub>31</sub> H <sub>33</sub> ClN <sub>8</sub> OPt              |
| Formula weight                               | 682.08                                                             | 764.19                                                            |
| Temperature, K                               | 100(2)                                                             | 100(2)                                                            |
| Crystal system                               | triclinic                                                          | triclinic                                                         |
| Space group                                  | P-1                                                                | P-1                                                               |
| a, Å                                         | 14.2846(3)                                                         | 9.87870(10)                                                       |
| b, Å                                         | 14.6219(2)                                                         | 13.0012(2)                                                        |
| c, Å                                         | 16.4653(3)                                                         | 13.0618(2)                                                        |
| $\alpha$ , °                                 | 89.2090(10)                                                        | 77.0320(10)                                                       |
| $\beta$ , °                                  | 69.989(2)                                                          | 78.1850(10)                                                       |
| $\gamma$ , °                                 | 84.4130(10)                                                        | 89.0880(10)                                                       |
| Volume, Å <sup>3</sup>                       | 3215.40(11)                                                        | 1599.38(4)                                                        |
| Z                                            | 4                                                                  | 2                                                                 |
| $\rho_{\text{calc}}$ , cm <sup>3</sup>       | 1.409                                                              | 1.587                                                             |
| $\mu$ , mm <sup>-1</sup>                     | 9.134                                                              | 9.271                                                             |
| F(000)                                       | 1336.0                                                             | 756.0                                                             |
| Crystal size, mm <sup>3</sup>                | 0.16 × 0.14 × 0.13                                                 | 0.06 × 0.05 × 0.01                                                |
| Radiation                                    | Cu K $\alpha$ ( $\lambda$ = 1.54184)                               | Cu K $\alpha$ ( $\lambda$ = 1.54184)                              |
| 2 $\theta$ range for data collection, °      | 5.714 to 139.994                                                   | 6.98 to 159.906                                                   |
| Index ranges                                 | −16 ≤ h ≤ 17,<br>−17 ≤ k ≤ 17,<br>−19 ≤ l ≤ 20                     | −12 ≤ h ≤ 12,<br>−16 ≤ k ≤ 16,<br>−16 ≤ l ≤ 16                    |
| Reflections collected                        | 88421                                                              | 60518                                                             |
| Independent reflections                      | 12186 [ $R_{\text{int}}$ = 0.0770,<br>$R_{\text{sigma}}$ = 0.0349] | 6745 [ $R_{\text{int}}$ = 0.0589,<br>$R_{\text{sigma}}$ = 0.0257] |
| Data/restraints/parameters                   | 12186/0/661                                                        | 6745/0/387                                                        |
| Goodness-of-fit on F <sup>2</sup>            | 1.082                                                              | 1.128                                                             |
| Final R indexes [ $I \geq 2\sigma$ (I)]      | $R_1$ = 0.0318,<br>$wR_2$ = 0.0869                                 | $R_1$ = 0.0284, $wR_2$ = 0.0764                                   |
| Final R indexes [all data]                   | $R_1$ = 0.0350,<br>$wR_2$ = 0.0891                                 | $R_1$ = 0.0293, $wR_2$ = 0.0771                                   |
| Largest diff. peak/hole/<br>eÅ <sup>-3</sup> | 2.02/−1.73                                                         | 1.22/−1.46                                                        |

**Table S2.** Selected bond lengths and angles for complex **3** in obtained crystal structures.

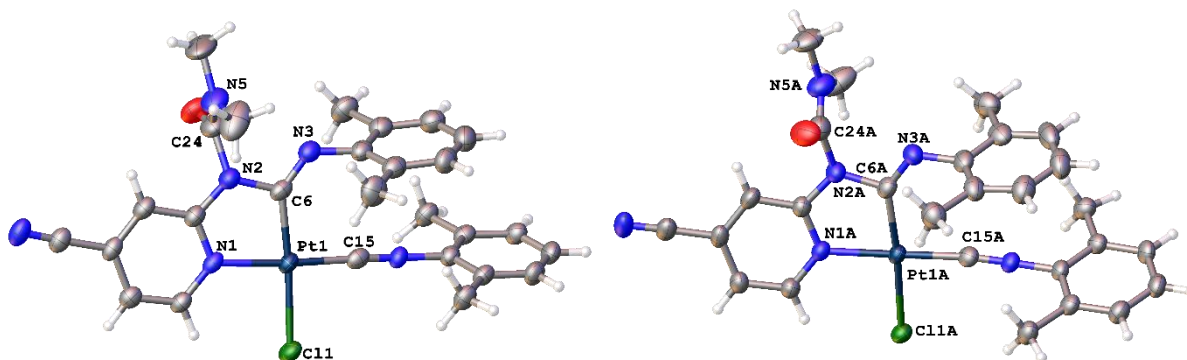

| Parameter   | <b>3</b>   |           | <b>3</b> ·2MeCN |
|-------------|------------|-----------|-----------------|
| Pt1–Cl1, Å  | 2.3801(11) | 2.3770(8) | 2.3787(9)       |
| Pt1–N1, Å   | 2.051(3)   | 2.045(3)  | 2.050(3)        |
| Pt1–C6, Å   | 1.992(4)   | 2.002(4)  | 1.924(4)        |
| Pt1–C15, Å  | 1.986(4)   | 1.921(4)  | 1.924(4)        |
| C6–N2, Å    | 1.433(5)   | 1.438(5)  | 1.467(6)        |
| C6–N3, Å    | 1.265(5)   | 1.254(5)  | 1.266(4)        |
| C24–N2, Å   | 1.467(6)   | 1.458(4)  | 1.478(6)        |
| C24–N5, Å   | 1.303(5)   | 1.319(6)  | 1.303(7)        |
| C6–Pt–N1, ° | 81.67(15)  | 81.53(12) | 81.18(13)       |
| N2–C6–N3, ° | 112.2(4)   | 113.8(3)  | 112.0(3)        |

**Table S3.** Geometrical parameters of the observed HBs in supramolecular dimers {**3A**}<sub>2</sub>, {**3A'**}<sub>2</sub>, {**3B**}<sub>2</sub>.

| Dimer                       | Contact (X–H···Y) | d(X–H···Y), Å | d(X···Y), Å | ∠(X–H···Y), ° |
|-----------------------------|-------------------|---------------|-------------|---------------|
| { <b>3A</b> } <sub>2</sub>  | C23–H23C···N6     | 2.466(4)      | 3.424(6)    | 165.7(2)      |
| { <b>3B</b> } <sub>2</sub>  | C23A–H23E···N6A   | 2.929(4)      | 3.854(6)    | 157.8(2)      |
| { <b>3A'</b> } <sub>2</sub> | C23–H23C···N6     | 2.724(3)      | 3.573(4)    | 142.0(2)      |
|                             | C1–H1···O1        | 2.739(3)      | 3.357(5)    | 123.3(2)      |

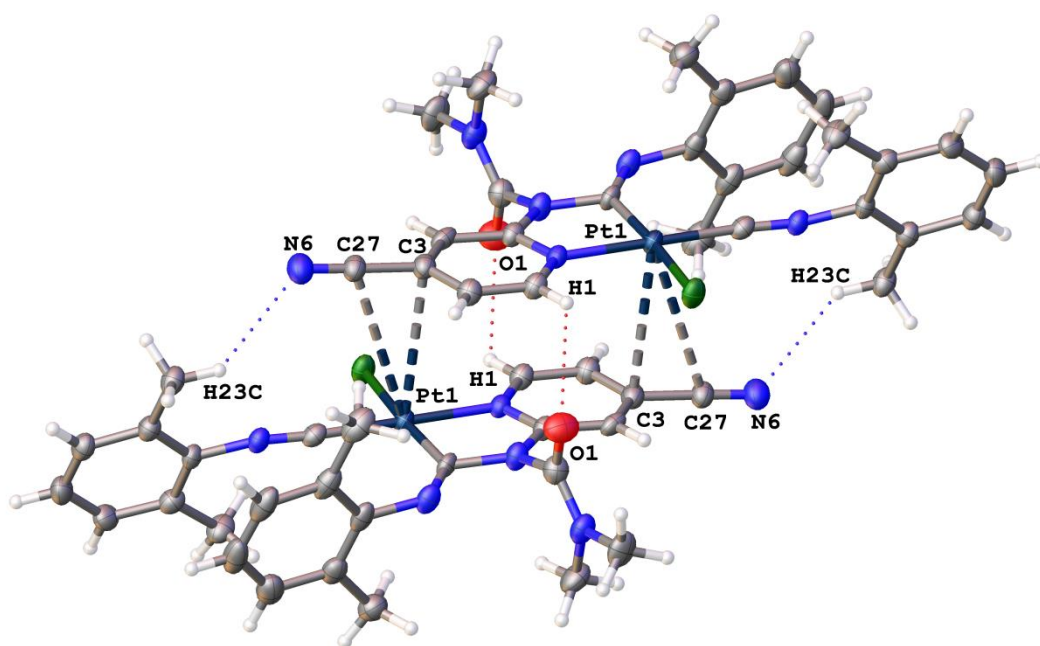

**Figure S1.** Structure of supramolecular dimer  $\{3A'\}_2$ .

## 2. Copies of NMR and HRMS spectra of complex 3

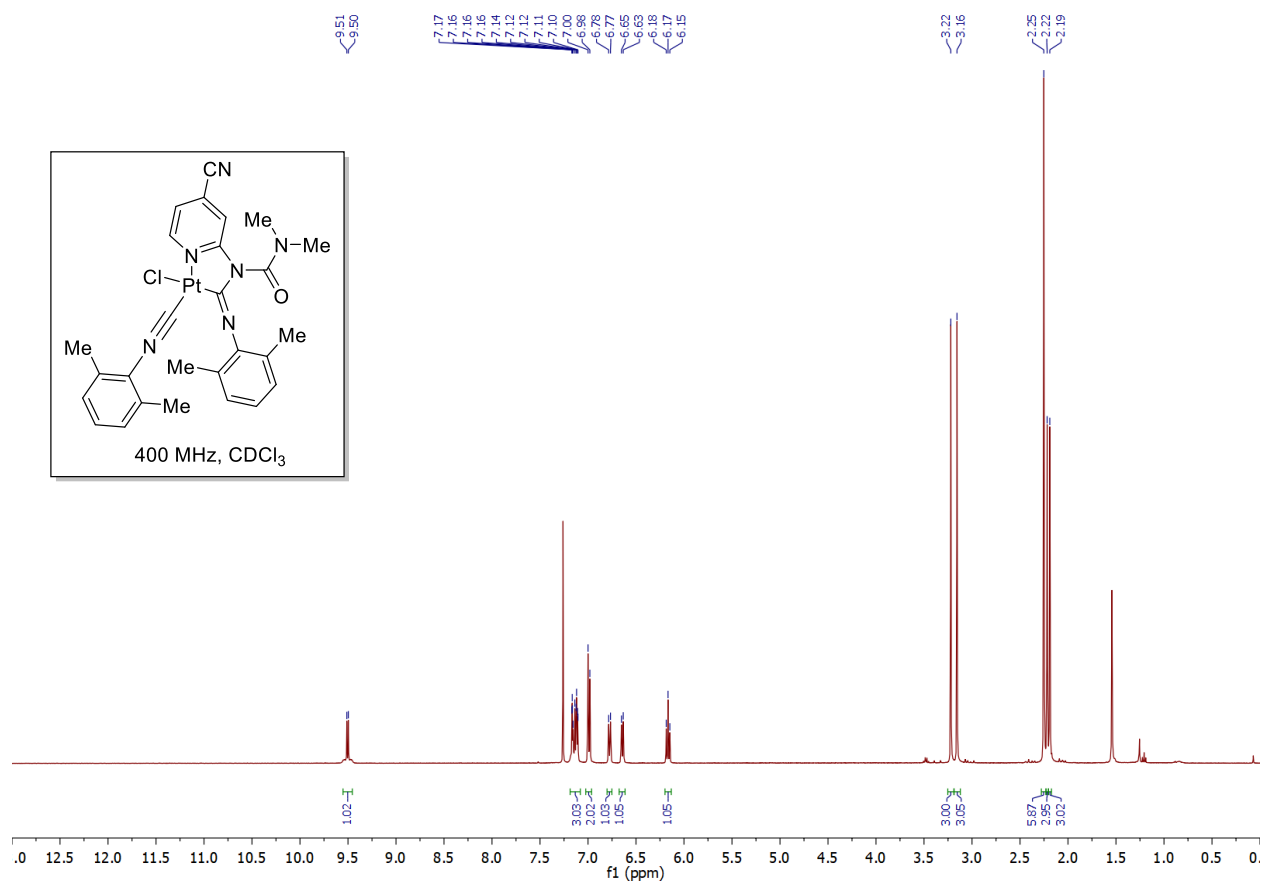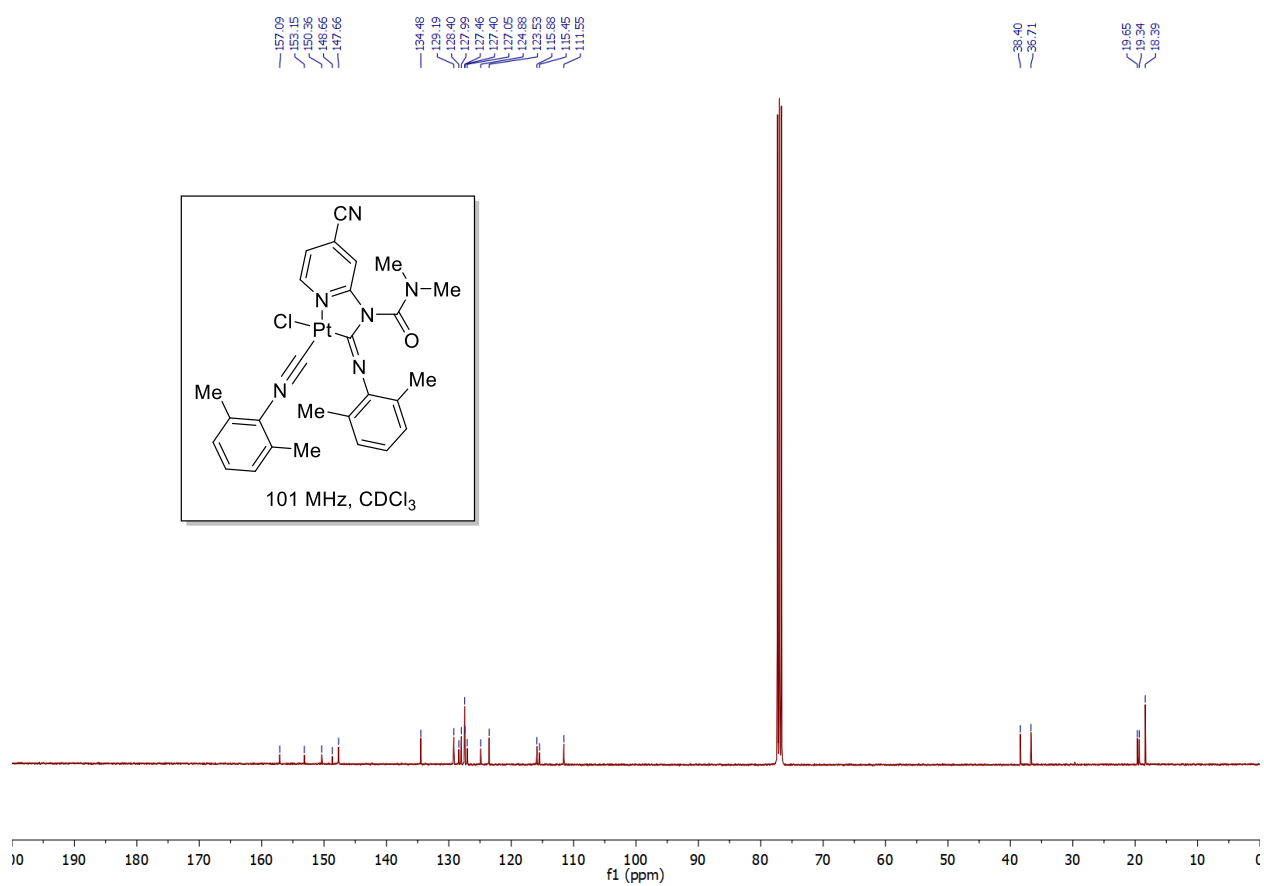

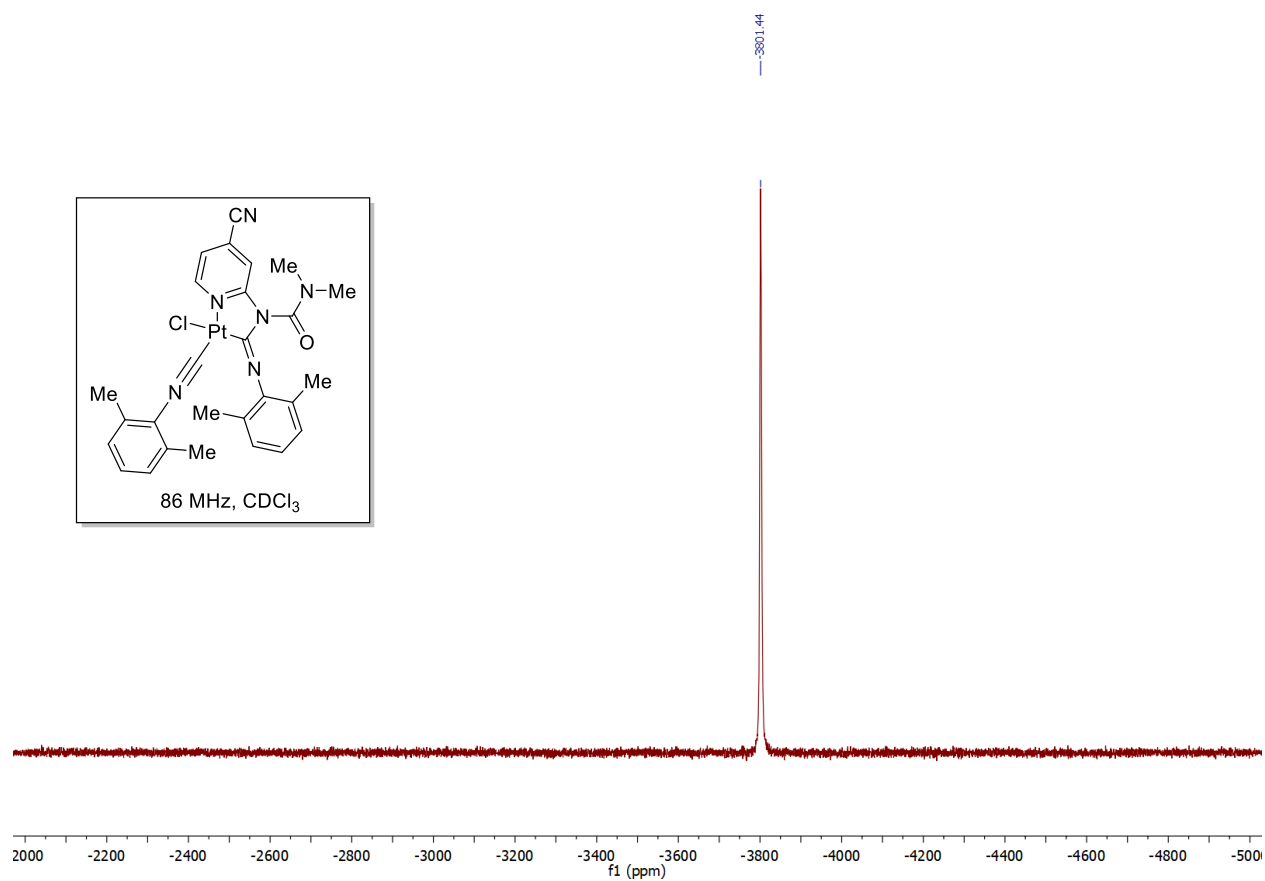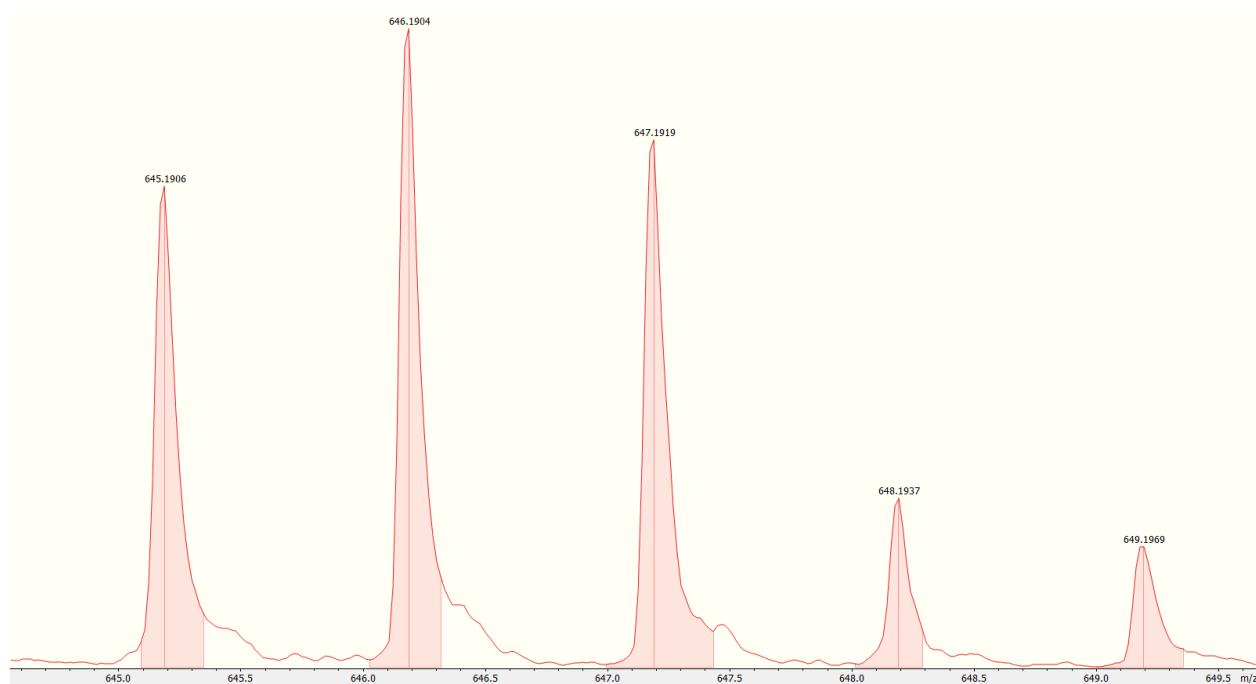

### 3. Computational study

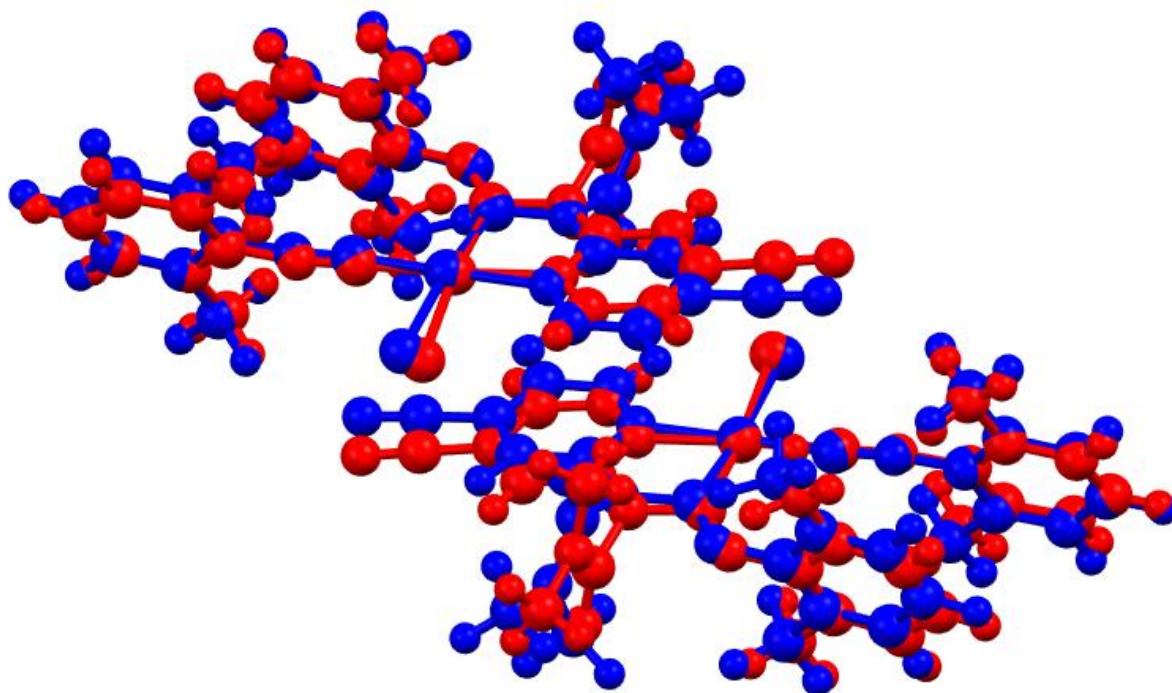

**Figure S2.** Overlay images for  $\{3\mathbf{A}\}_2$  of X-ray geometry (red) and its optimized (blue) computational clusters  $[3\mathbf{A}]_2$ .



#### 4. Cartesian coordinates for the studied molecules

Optimized geometries

Cartesian coordinate for **3A** (in Å)

|    |               |              |             |
|----|---------------|--------------|-------------|
| Pt | -5.533809473  | 0.191634618  | 3.289121846 |
| Cl | -5.722629195  | 2.539470232  | 3.073536815 |
| N  | -3.500929628  | 0.214363884  | 3.025596697 |
| N  | -8.571311271  | 0.285756221  | 3.480648518 |
| N  | -3.780539779  | -2.034508362 | 3.354174805 |
| O  | -3.042137368  | -3.765453035 | 2.026746425 |
| N  | -5.888588437  | -2.786830361 | 3.705253014 |
| N  | -3.252346839  | -4.150578331 | 4.259035762 |
| C  | -1.566450763  | -1.178555150 | 2.794662805 |
| H  | -1.128043628  | -2.171166601 | 2.769309545 |
| C  | -5.178108935  | -1.755176332 | 3.486933613 |
| C  | -2.756032195  | 1.305683389  | 2.786588205 |
| H  | -3.311389506  | 2.244630523  | 2.788391786 |
| N  | 1.737130233   | -0.282450506 | 2.079655031 |
| C  | -2.937954076  | -1.012176682 | 3.048842803 |
| C  | -1.399368621  | 1.228714010  | 2.548255072 |
| H  | -0.817859004  | 2.125332590  | 2.356675800 |
| C  | -9.937415414  | 0.398370314  | 3.531007854 |
| C  | -7.412195991  | 0.152411882  | 3.438466365 |
| C  | -10.664971985 | 0.251461094  | 2.336072085 |
| C  | -0.801112979  | -0.045868963 | 2.547124144 |
| C  | 0.602674821   | -0.180502777 | 2.290563265 |
| C  | -10.541833914 | 0.650212931  | 4.775710974 |
| C  | -7.921629019  | -2.607769125 | 5.029343289 |
| C  | -12.055000255 | 0.326429965  | 2.422718461 |
| H  | -12.647097091 | 0.210415775  | 1.515588303 |
| C  | -3.341575311  | -3.402392128 | 3.141211809 |
| C  | -9.951277181  | 0.020179766  | 1.040494495 |

|   |               |              |             |
|---|---------------|--------------|-------------|
| H | -10.660542828 | -0.071500160 | 0.212381019 |
| H | -9.349953202  | -0.896677128 | 1.086257944 |
| H | -9.263193692  | 0.845826835  | 0.815931248 |
| C | -11.934773487 | 0.715626801  | 4.807586279 |
| H | -12.433043258 | 0.903306417  | 5.758101997 |
| C | -7.275501669  | -2.791143439 | 3.789131303 |
| C | -12.686063229 | 0.547875605  | 3.645673340 |
| H | -13.772599670 | 0.600383201  | 3.691991606 |
| C | -8.018675133  | -3.059648781 | 2.620133283 |
| C | -9.699474731  | 0.835671460  | 5.999687936 |
| H | -9.079066221  | -0.050132296 | 6.185165121 |
| H | -10.322009625 | 1.014299040  | 6.881660531 |
| H | -9.015041720  | 1.686262950  | 5.881912616 |
| C | -3.599796120  | -3.706583612 | 5.585164630 |
| H | -2.806760701  | -3.993645071 | 6.288089325 |
| H | -4.543793337  | -4.162140313 | 5.910495062 |
| H | -3.715830455  | -2.622178095 | 5.611113014 |
| C | -9.315563213  | -2.693905017 | 5.076481842 |
| H | -9.821301154  | -2.549560832 | 6.031876993 |
| C | -2.952687960  | -5.556792951 | 4.114116817 |
| H | -3.827281947  | -6.164667024 | 4.385161046 |
| H | -2.115161160  | -5.836661553 | 4.765973876 |
| H | -2.686392969  | -5.755966233 | 3.074345355 |
| C | -10.062630213 | -2.954043254 | 3.930239225 |
| H | -11.148877037 | -3.003868595 | 3.983961998 |
| C | -7.119588209  | -2.307097747 | 6.261025450 |
| H | -6.418146703  | -3.120587625 | 6.485382485 |
| H | -7.770311825  | -2.173139101 | 7.131858773 |
| H | -6.518346045  | -1.395983347 | 6.136215602 |
| C | -9.410261725  | -3.138411619 | 2.713392917 |
| H | -9.988752427  | -3.348269276 | 1.812890292 |

|   |              |              |             |
|---|--------------|--------------|-------------|
| C | -7.303140437 | -3.228899706 | 1.313074410 |
| H | -6.882125765 | -2.274392305 | 0.965359090 |
| H | -7.977055199 | -3.607345487 | 0.537026898 |
| H | -6.453541347 | -3.915952819 | 1.414306963 |

Cartesian coordinate for **3B** (in Å)

|    |                   |                   |                   |
|----|-------------------|-------------------|-------------------|
| Pt | 16.51466921207595 | 4.33330961605363  | 8.92455096437090  |
| Cl | 18.24181871577911 | 3.18629320915664  | 7.78843472525576  |
| N  | 16.42778592733429 | 5.83796961181970  | 7.54449905373245  |
| N  | 14.88453855853297 | 6.64344983164726  | 9.02073857832969  |
| N  | 16.78256635462710 | 2.03129366177991  | 10.89625327063657 |
| N  | 14.27292336791437 | 5.29347641248471  | 10.72312231053617 |
| C  | 16.94271407976309 | 0.89834140921174  | 11.65715751954622 |
| O  | 12.74381662835252 | 7.38471835316235  | 8.59098046594949  |
| C  | 17.02629279491979 | 6.95647726918521  | 5.53897152942512  |
| H  | 17.62395807392470 | 6.99464441317953  | 4.64019813106576  |
| C  | 17.66553291483284 | 0.98981176688207  | 12.84793691498714 |
| C  | 15.06333115718607 | 5.42358773744145  | 9.74149560408493  |
| C  | 17.15524215495927 | 5.91607605645175  | 6.42266507956200  |
| H  | 17.84686136382328 | 5.09491525098050  | 6.27322313102045  |
| N  | 15.79017941323127 | 9.94452882697550  | 4.22068608471115  |
| C  | 15.53719722928113 | 6.80197232882714  | 7.84387304656927  |
| C  | 16.59570320431805 | 2.94272732595165  | 10.20647625756641 |
| C  | 16.09410634387401 | 7.95656974795017  | 5.83617467977870  |
| C  | 17.78838716343211 | -0.16529980471055 | 13.60556892976439 |
| H  | 18.34057551991467 | -0.12644758748487 | 14.53749764965912 |
| C  | 15.33901749657031 | 7.88898825824159  | 6.98903493215452  |
| H  | 14.60016297239274 | 8.64156025206245  | 7.22087361512640  |
| C  | 14.19089551323795 | 4.12377542910429  | 11.47571115872933 |
| C  | 16.37441272819786 | -0.29000216691047 | 11.19140007778456 |
| C  | 18.27454765441078 | 2.28660687102772  | 13.26618082461005 |

|   |                   |                   |                   |
|---|-------------------|-------------------|-------------------|
| H | 17.51162894183956 | 3.06260672380247  | 13.35945566797565 |
| H | 18.99860943066608 | 2.63602605309489  | 12.52535623650671 |
| H | 18.78465520810532 | 2.18347334471878  | 14.22344174525389 |
| C | 17.21964664446781 | -1.35626454633380 | 13.18331941327493 |
| H | 17.32546384941534 | -2.24794315265268 | 13.78982006415309 |
| N | 13.87817148422700 | 8.32318041020828  | 10.31962378726326 |
| C | 14.77363375390048 | 4.07097607609771  | 12.74763039524589 |
| C | 15.92035588844617 | 9.05837083405570  | 4.94261019674569  |
| C | 16.52543167879221 | -1.41699173285693 | 11.98559590807687 |
| H | 16.09250598501893 | -2.35397478235573 | 11.65470695839991 |
| C | 13.44124518304052 | 3.04561645835686  | 10.98442256308625 |
| C | 15.63795199868181 | -0.31825821949682 | 9.89410135927235  |
| H | 14.78349838637020 | 0.36288729718883  | 9.91981380946232  |
| H | 15.27533589353826 | -1.32246222355485 | 9.67736415908368  |
| H | 16.28009256514446 | 0.00535818001184  | 9.07060915456886  |
| C | 14.62096687610561 | 2.91861162975555  | 13.50660898604601 |
| H | 15.08186587391256 | 2.86903522264484  | 14.48764211568724 |
| C | 13.30570683262645 | 1.91441391935617  | 11.77943791726745 |
| H | 12.72203918430995 | 1.07911576931318  | 11.40652152559528 |
| C | 13.72144752319411 | 7.46703692993281  | 9.29751159488246  |
| C | 12.80812486905459 | 3.11913519448389  | 9.63137143549492  |
| H | 13.56179477724646 | 3.08794682067359  | 8.83873933248150  |
| H | 12.26104653118399 | 4.05611482513629  | 9.50273557943107  |
| H | 12.12149157735711 | 2.28541474108998  | 9.48037464338343  |
| C | 13.89529004943994 | 1.84001976217702  | 13.02983512731692 |
| H | 13.79142470603697 | 0.94448118611685  | 13.63059971257998 |
| C | 15.55980376043194 | 5.23399079280851  | 13.26070073245427 |
| H | 16.38878480336652 | 5.48439387633338  | 12.59293251480054 |
| H | 15.96471308179490 | 5.02441802822838  | 14.25169023953843 |
| H | 14.93075959149323 | 6.12531651873425  | 13.33090036091357 |
| C | 15.04466022229652 | 8.40343742871521  | 11.16254906069013 |

|   |                   |                   |                   |
|---|-------------------|-------------------|-------------------|
| H | 14.82491705992763 | 8.00796259127338  | 12.15701347332018 |
| H | 15.34827744630511 | 9.44902704952298  | 11.26017651255719 |
| H | 15.86556491108450 | 7.83507819552682  | 10.73718371983287 |
| C | 12.73474782681347 | 9.09388240361675  | 10.75054193082236 |
| H | 11.93400085611991 | 8.97537087221852  | 10.02621517947795 |
| H | 13.00741876329644 | 10.14899736238453 | 10.82999875668253 |
| H | 12.39309144206089 | 8.74505607920132  | 11.72984259541719 |

Cartesian coordinate for [3A]<sub>2</sub> (in Å)

|    |               |              |             |
|----|---------------|--------------|-------------|
| Pt | -5.589517000  | 0.179332000  | 3.168545000 |
| Cl | -5.767295000  | 2.525301000  | 2.869154000 |
| N  | -3.534609000  | 0.221487000  | 3.195307000 |
| N  | -8.639254000  | 0.231837000  | 3.151570000 |
| N  | -3.848030000  | -2.042138000 | 3.233861000 |
| O  | -3.370022000  | -3.715727000 | 1.723997000 |
| N  | -5.946941000  | -2.813139000 | 3.516663000 |
| N  | -3.107299000  | -4.167398000 | 3.938088000 |
| C  | -1.576012000  | -1.162666000 | 3.239078000 |
| H  | -1.124178000  | -2.149622000 | 3.212978000 |
| C  | -5.241037000  | -1.768710000 | 3.345799000 |
| C  | -2.769079000  | 1.324324000  | 3.196959000 |
| H  | -3.303935000  | 2.271641000  | 3.139166000 |
| N  | 1.782023000   | -0.201671000 | 3.481762000 |
| C  | -2.968429000  | -1.006432000 | 3.209380000 |
| C  | -1.390573000  | 1.257849000  | 3.232648000 |
| H  | -0.805658000  | 2.171315000  | 3.201688000 |
| C  | -9.984205000  | 0.409796000  | 3.368225000 |
| C  | -7.477490000  | 0.118008000  | 3.155584000 |
| C  | -10.895965000 | 0.122312000  | 2.337945000 |
| C  | -0.792317000  | -0.013650000 | 3.264023000 |
| C  | 0.633413000   | -0.128616000 | 3.357046000 |

|   |               |              |             |
|---|---------------|--------------|-------------|
| C | -10.377245000 | 0.877222000  | 4.637090000 |
| C | -7.884580000  | -2.498568000 | 4.944737000 |
| C | -12.251526000 | 0.292704000  | 2.623575000 |
| H | -12.982821000 | 0.074400000  | 1.846478000 |
| C | -3.436632000  | -3.390010000 | 2.887507000 |
| C | -10.416086000 | -0.360598000 | 1.007405000 |
| H | -11.249748000 | -0.468883000 | 0.307212000 |
| H | -9.921817000  | -1.334627000 | 1.111011000 |
| H | -9.671308000  | 0.311996000  | 0.567584000 |
| C | -11.744031000 | 1.029379000  | 4.869268000 |
| H | -12.077783000 | 1.386508000  | 5.842615000 |
| C | -7.325238000  | -2.817632000 | 3.688542000 |
| C | -12.674446000 | 0.735279000  | 3.874824000 |
| H | -13.737657000 | 0.859878000  | 4.074215000 |
| C | -8.142531000  | -3.226724000 | 2.616626000 |
| C | -9.348156000  | 1.188306000  | 5.678949000 |
| H | -8.771205000  | 0.291412000  | 5.938660000 |
| H | -9.816782000  | 1.572586000  | 6.589529000 |
| H | -8.628889000  | 1.934605000  | 5.316568000 |
| C | -3.355478000  | -3.821693000 | 5.317099000 |
| H | -2.472837000  | -4.056792000 | 5.924825000 |
| H | -4.213443000  | -4.385750000 | 5.707651000 |
| H | -3.575222000  | -2.757678000 | 5.412383000 |
| C | -9.270770000  | -2.573502000 | 5.097074000 |
| H | -9.711013000  | -2.320257000 | 6.061700000 |
| C | -2.723607000  | -5.536592000 | 3.676721000 |
| H | -3.538099000  | -6.225497000 | 3.941849000 |
| H | -1.836291000  | -5.795557000 | 4.266799000 |
| H | -2.500784000  | -5.644802000 | 2.613561000 |
| C | -10.091866000 | -2.967812000 | 4.043570000 |
| H | -11.171001000 | -3.013599000 | 4.178632000 |

|    |               |              |              |
|----|---------------|--------------|--------------|
| C  | -6.998827000  | -2.088053000 | 6.084105000  |
| H  | -6.210851000  | -2.832573000 | 6.255703000  |
| H  | -7.574785000  | -1.977621000 | 7.008860000  |
| H  | -6.491023000  | -1.135680000 | 5.879162000  |
| C  | -9.522911000  | -3.301188000 | 2.817309000  |
| H  | -10.159404000 | -3.625540000 | 1.993692000  |
| C  | -7.521681000  | -3.527938000 | 1.285705000  |
| H  | -7.301791000  | -2.597194000 | 0.742530000  |
| H  | -8.192163000  | -4.125777000 | 0.659364000  |
| H  | -6.570086000  | -4.059466000 | 1.406713000  |
| Pt | 0.000000000   | 0.000000000  | 0.000000000  |
| Cl | 0.211138000   | -2.344273000 | 0.278021000  |
| N  | -2.054551000  | -0.072672000 | -0.018466000 |
| N  | 3.050030000   | 0.000000000  | 0.000000000  |
| N  | -1.774081000  | 2.195659000  | -0.039130000 |
| O  | -2.211832000  | 3.864452000  | 1.488445000  |
| N  | 0.309384000   | 3.000992000  | -0.328124000 |
| N  | -2.612800000  | 4.295763000  | -0.708685000 |
| C  | -4.032844000  | 1.282861000  | -0.064828000 |
| H  | -4.498903000  | 2.263121000  | -0.038486000 |
| C  | -0.377814000  | 1.943936000  | -0.159296000 |
| C  | -2.803859000  | -1.186488000 | -0.021686000 |
| H  | -2.254587000  | -2.125648000 | 0.035710000  |
| N  | -7.374633000  | 0.277146000  | -0.325852000 |
| C  | -2.638633000  | 1.147123000  | -0.028504000 |
| C  | -4.183306000  | -1.140186000 | -0.060033000 |
| H  | -4.754901000  | -2.062094000 | -0.030242000 |
| C  | 4.399304000   | -0.144177000 | -0.213855000 |
| C  | 1.886386000   | 0.091233000  | 0.003080000  |
| C  | 5.299161000   | 0.144416000  | 0.826574000  |
| C  | -4.799422000  | 0.122448000  | -0.094302000 |

|   |              |              |              |
|---|--------------|--------------|--------------|
| C | -6.225878000 | 0.217951000  | -0.195167000 |
| C | 4.808903000  | -0.578101000 | -1.489215000 |
| C | 2.241516000  | 2.743646000  | -1.772164000 |
| C | 6.659603000  | 0.010674000  | 0.544945000  |
| H | 7.382019000  | 0.230912000  | 1.329759000  |
| C | -2.200983000 | 3.534090000  | 0.324716000  |
| C | 4.801231000  | 0.590134000  | 2.163580000  |
| H | 5.629211000  | 0.710139000  | 2.868596000  |
| H | 4.279547000  | 1.551279000  | 2.075316000  |
| H | 4.075371000  | -0.112017000 | 2.588960000  |
| C | 6.179914000  | -0.694616000 | -1.716988000 |
| H | 6.526525000  | -1.025283000 | -2.695180000 |
| C | 1.686457000  | 3.029669000  | -0.506461000 |
| C | 7.098508000  | -0.398255000 | -0.712270000 |
| H | 8.165249000  | -0.494598000 | -0.908439000 |
| C | 2.504578000  | 3.429630000  | 0.568136000  |
| C | 3.792104000  | -0.891737000 | -2.542319000 |
| H | 3.196153000  | -0.003023000 | -2.786803000 |
| H | 4.273644000  | -1.246868000 | -3.457992000 |
| H | 3.088604000  | -1.661447000 | -2.198548000 |
| C | -2.409109000 | 3.962676000  | -2.098221000 |
| H | -3.337048000 | 4.119500000  | -2.662549000 |
| H | -1.622405000 | 4.594145000  | -2.533375000 |
| H | -2.104664000 | 2.920543000  | -2.201653000 |
| C | 3.625321000  | 2.842388000  | -1.932412000 |
| H | 4.062549000  | 2.615475000  | -2.904952000 |
| C | -3.048919000 | 5.644987000  | -0.426165000 |
| H | -2.271869000 | 6.371823000  | -0.702305000 |
| H | -3.959576000 | 5.868725000  | -0.994478000 |
| H | -3.252458000 | 5.734827000  | 0.642610000  |
| C | 4.447630000  | 3.227831000  | -0.876553000 |



|   |             |             |              |
|---|-------------|-------------|--------------|
| H | 5.525072000 | 3.292030000 | -1.017509000 |
| C | 1.351965000 | 2.341751000 | -2.911497000 |
| H | 0.545940000 | 3.073003000 | -3.054971000 |
| H | 1.919115000 | 2.265826000 | -3.845139000 |
| H | 0.867230000 | 1.373866000 | -2.723673000 |
| C | 3.882360000 | 3.528132000 | 0.359952000  |
| H | 4.519917000 | 3.844872000 | 1.185691000  |
| C | 1.887708000 | 3.695365000 | 1.908512000  |
| H | 1.687002000 | 2.750876000 | 2.435466000  |
| H | 2.552160000 | 4.292644000 | 2.541787000  |
| H | 0.926269000 | 4.212510000 | 1.803739000  |

Cartesian coordinate for [**3B**]<sub>2</sub> (in Å)

|    |              |              |              |
|----|--------------|--------------|--------------|
| Pt | 16.705157000 | 4.999167000  | 8.580572000  |
| Cl | 18.408864000 | 3.920626000  | 7.297961000  |
| N  | 16.329587000 | 6.410230000  | 7.144849000  |
| N  | 14.976510000 | 7.225362000  | 8.801943000  |
| N  | 17.226639000 | 2.821817000  | 10.658272000 |
| N  | 14.488212000 | 5.772593000  | 10.480054000 |
| C  | 17.343662000 | 1.612838000  | 11.305275000 |
| O  | 12.830442000 | 8.041983000  | 8.581899000  |
| C  | 16.513677000 | 7.385652000  | 4.980459000  |
| H  | 16.945817000 | 7.375691000  | 3.984635000  |
| C  | 17.763519000 | 1.566459000  | 12.644724000 |
| C  | 15.241096000 | 5.997151000  | 9.481978000  |
| C  | 16.855886000 | 6.427137000  | 5.908183000  |
| H  | 17.555825000 | 5.619091000  | 5.703045000  |
| N  | 14.834526000 | 10.182051000 | 3.675321000  |
| C  | 15.446804000 | 7.353702000  | 7.530019000  |
| C  | 16.985031000 | 3.695263000  | 9.920521000  |
| C  | 15.579225000 | 8.367240000  | 5.365317000  |

|   |              |              |              |
|---|--------------|--------------|--------------|
| C | 17.815798000 | 0.309567000  | 13.250596000 |
| H | 18.131599000 | 0.241305000  | 14.290747000 |
| C | 15.046538000 | 8.367164000  | 6.643651000  |
| H | 14.319768000 | 9.109428000  | 6.950884000  |
| C | 14.438248000 | 4.568498000  | 11.169565000 |
| C | 16.997647000 | 0.464185000  | 10.564533000 |
| C | 18.157214000 | 2.805273000  | 13.384782000 |
| H | 17.558910000 | 3.665973000  | 13.070335000 |
| H | 19.210829000 | 3.044531000  | 13.192105000 |
| H | 18.027692000 | 2.669803000  | 14.463314000 |
| C | 17.472919000 | -0.843312000 | 12.549858000 |
| H | 17.520634000 | -1.811949000 | 13.044943000 |
| N | 14.095349000 | 8.802571000  | 10.313034000 |
| C | 14.871336000 | 4.523550000  | 12.509290000 |
| C | 15.170375000 | 9.376841000  | 4.436932000  |
| C | 17.071441000 | -0.765098000 | 11.217720000 |
| H | 16.806564000 | -1.669653000 | 10.672057000 |
| C | 13.869450000 | 3.429572000  | 10.556552000 |
| C | 16.548364000 | 0.588216000  | 9.141994000  |
| H | 15.612843000 | 1.160712000  | 9.079961000  |
| H | 16.376755000 | -0.397235000 | 8.699636000  |
| H | 17.285903000 | 1.123243000  | 8.529053000  |
| C | 14.769614000 | 3.321866000  | 13.212021000 |
| H | 15.113713000 | 3.282669000  | 14.245438000 |
| C | 13.791284000 | 2.246432000  | 11.295962000 |
| H | 13.357190000 | 1.362414000  | 10.828508000 |
| C | 13.855714000 | 8.047471000  | 9.224879000  |
| C | 13.345310000 | 3.498080000  | 9.151709000  |
| H | 14.160789000 | 3.522183000  | 8.415350000  |
| H | 12.756782000 | 4.410938000  | 8.995989000  |
| H | 12.713905000 | 2.631588000  | 8.929621000  |

|    |              |              |              |
|----|--------------|--------------|--------------|
| C  | 14.244262000 | 2.181364000  | 12.610669000 |
| H  | 14.187052000 | 1.246116000  | 13.164575000 |
| C  | 15.447050000 | 5.757009000  | 13.135550000 |
| H  | 16.391835000 | 6.046417000  | 12.653723000 |
| H  | 15.639871000 | 5.610673000  | 14.203303000 |
| H  | 14.762535000 | 6.605552000  | 13.010983000 |
| C  | 15.357318000 | 8.896770000  | 11.003749000 |
| H  | 15.200068000 | 8.769617000  | 12.081769000 |
| H  | 15.825581000 | 9.873241000  | 10.820548000 |
| H  | 16.037821000 | 8.117778000  | 10.664245000 |
| C  | 13.023040000 | 9.622639000  | 10.825302000 |
| H  | 12.143001000 | 9.487812000  | 10.193820000 |
| H  | 13.314438000 | 10.681537000 | 10.819528000 |
| H  | 12.778947000 | 9.330959000  | 11.855715000 |
| Pt | 18.922392000 | 9.230311000  | 6.887176000  |
| Cl | 17.219187000 | 10.308702000 | 8.169983000  |
| N  | 19.298216000 | 7.819064000  | 8.322868000  |
| N  | 20.651224000 | 7.004164000  | 6.665562000  |
| N  | 18.400894000 | 11.408073000 | 4.809741000  |
| N  | 21.139261000 | 8.456957000  | 4.987453000  |
| C  | 18.283378000 | 12.617465000 | 4.163563000  |
| O  | 22.797039000 | 6.186731000  | 6.885100000  |
| C  | 19.114318000 | 6.843217000  | 10.487107000 |
| H  | 18.682198000 | 6.853064000  | 11.482934000 |
| C  | 17.864117000 | 12.664457000 | 2.823925000  |
| C  | 20.386494000 | 8.232397000  | 5.985629000  |
| C  | 18.771885000 | 7.801781000  | 9.559512000  |
| H  | 18.071655000 | 8.609541000  | 9.764788000  |
| N  | 20.794036000 | 4.047311000  | 11.792193000 |
| C  | 20.181034000 | 6.875686000  | 7.937528000  |
| C  | 18.642399000 | 10.534498000 | 5.547385000  |

|   |              |              |              |
|---|--------------|--------------|--------------|
| C | 20.048951000 | 5.861867000  | 10.102100000 |
| C | 17.811077000 | 13.921732000 | 2.218929000  |
| H | 17.495717000 | 13.990493000 | 1.178678000  |
| C | 20.581510000 | 5.862149000  | 8.823700000  |
| H | 21.308464000 | 5.120080000  | 8.516434000  |
| C | 21.189098000 | 9.660944000  | 4.297760000  |
| C | 18.628103000 | 13.765839000 | 4.905316000  |
| C | 17.471744000 | 11.425823000 | 2.082885000  |
| H | 18.070603000 | 10.565396000 | 2.397013000  |
| H | 16.418215000 | 11.185608000 | 2.274889000  |
| H | 17.601644000 | 11.561971000 | 1.004477000  |
| C | 18.152706000 | 15.074371000 | 2.920678000  |
| H | 18.104448000 | 16.043331000 | 2.426276000  |
| N | 21.531583000 | 5.426989000  | 5.154012000  |
| C | 20.755916000 | 9.705670000  | 2.958049000  |
| C | 20.458158000 | 4.852506000  | 11.030575000 |
| C | 18.553632000 | 14.995519000 | 4.252934000  |
| H | 18.817465000 | 15.899910000 | 4.799375000  |
| C | 21.758024000 | 10.799960000 | 4.910466000  |
| C | 19.076728000 | 13.641205000 | 6.328008000  |
| H | 20.012771000 | 13.069580000 | 6.390111000  |
| H | 19.247158000 | 14.626487000 | 6.771197000  |
| H | 18.339344000 | 13.105031000 | 6.940135000  |
| C | 20.857792000 | 10.907160000 | 2.255035000  |
| H | 20.513673000 | 10.946152000 | 1.221619000  |
| C | 21.836280000 | 11.982937000 | 4.170804000  |
| H | 22.270457000 | 12.867022000 | 4.638052000  |
| C | 21.771699000 | 6.181832000  | 6.242233000  |
| C | 22.282279000 | 10.731646000 | 6.315285000  |
| H | 21.466839000 | 10.707342000 | 7.051678000  |
| H | 22.871028000 | 9.818929000  | 6.471019000  |

|   |              |              |             |
|---|--------------|--------------|-------------|
| H | 22.913485000 | 11.598293000 | 6.537324000 |
| C | 21.383299000 | 12.047760000 | 2.856096000 |
| H | 21.440649000 | 12.982853000 | 2.301946000 |
| C | 20.179959000 | 8.472197000  | 2.332041000 |
| H | 19.235870000 | 8.182230000  | 2.814887000 |
| H | 19.985853000 | 8.618829000  | 1.264561000 |
| H | 20.864931000 | 7.623826000  | 2.455420000 |
| C | 20.269357000 | 5.333073000  | 4.463728000 |
| H | 20.426414000 | 5.459466000  | 3.385597000 |
| H | 19.800583000 | 4.356988000  | 4.647705000 |
| H | 19.589374000 | 6.112680000  | 4.802876000 |
| C | 22.603460000 | 4.606523000  | 4.641472000 |
| H | 23.483928000 | 4.741544000  | 5.272314000 |
| H | 22.311974000 | 3.547646000  | 4.648001000 |
| H | 22.846859000 | 4.897632000  | 3.610740000 |
